# Supplementary material for: Merozoite surface protein-1 genetic diversity in Plasmodium malariae and Plasmodium brasilianum from Brazil
Source: BMC Infect Dis. 2015 Nov 16;15:529. doi: 10.1186/s12879-015-1238-8 (PMC4647813; doi:10.1186/s12879-015-1238-8)
Supplement: Additional file 1: — Pairwise similarity matrix among P. malariae/P. brasilianum isolates based on the MSP1 protein sequence fragments. The matrices on the left show, for each fragment separately, the raw numbers of identical amino acids and total amino acids compared between each pair of isolates. The matrices on the right show the aggregated similarity or difference values for the concatenated regions.(XLS 40 kb) [file 12879_2015_1238_MOESM1_ESM.xls]

## Sheet: Sheet1
	MM1A		23PA		50PA		66PA		157a		Ant		I11		58		72		222a		M95		190		P169		P177		P171		PIII		23a
Fragment 1*																																				Aggregated similarity values for the concatenated regions
MM1A																																				SIMILARITY	MM1A	23PA	50PA	66PA	157a	Ant	I11	58	72	222a	M95	190	P169
23PA	170	177																																		MM1A	1
50PA	170	177	177	177																																23PA	0.967105	1
66PA	170	177	177	177	177	177																														50PA	0.967105	0.994737	1
157a	165	177	170	177	170	177	170	177																												66PA	0.985019	1	1	1
Ant	165	177	170	177	170	177	170	177	177	177																										157a	0.953441	0.981579	0.981579	0.979401	1
I11	165	177	170	177	170	177	170	177	177	177	177	177																								Ant	0.963265	0.975635	0.971053	0.980263	0.989848	1
58	165	177	170	177	170	177	170	177	175	177	175	177	175	177																						I11	0.953441	0.985787	0.983756	0.990789	1	0.989848	1
72	165	177	170	177	170	177	170	177	175	177	175	177	175	177	177	177																				58	0.958333	0.97868	0.979695	0.985787	0.990863	0.983756	0.990863	1
222a	165	177	170	177	170	177	170	177	175	177	175	177	175	177	177	177	177	177																		72	0.958333	0.97868	0.979695	0.985787	0.990863	0.983756	0.990863	1	1
M95	165	177	170	177	170	177	170	177	175	177	175	177	175	177	177	177	177	177	177	177																222a	0.956301	0.97665	0.977665	0.983756	0.988832	0.981726	0.988832	0.997961	0.997961	1
190	166	177	171	177	171	177	171	177	175	177	175	177	175	177	175	177	175	177	175	177	175	177														M95	0.915479	0.930964	0.932995	0.938071	0.943147	0.937056	0.943147	0.950051	0.950051	0.948012	1
P169	165	177	170	177	170	177	170	177	175	177	175	177	175	177	174	177	174	177	174	177	174	177	174	177												190	0.962322	0.97868	0.980711	0.985787	0.989848	0.983756	0.989848	0.994903	0.994903	0.992864	0.95097	1
P177	165	177	170	177	170	177	170	177	175	177	175	177	175	177	174	177	174	177	174	177	174	177	174	177	177	177										P169	0.955285	0.968623	0.970648	0.973684	0.978745	0.972672	0.978745	0.98374	0.98374	0.982724	0.935976	0.982724	1
P171	164	177	169	177	169	177	169	177	174	177	174	177	174	177	173	177	173	177	173	177	173	177	173	177	176	177	176	177								P177	0.949084	0.965482	0.967513	0.970558	0.975635	0.969543	0.975635	0.979613	0.979613	0.979613	0.935649	0.982635	0.982653
PIII	164	177	169	177	169	177	169	177	176	177	176	177	176	177	174	177	174	177	174	177	174	177	174	177	174	177	174	177	173	177						P171	0.957317	0.97665	0.97868	0.981726	0.986802	0.980711	0.986802	0.991845	0.991845	0.990826	0.943935	0.990826	0.989837
23a	165	177	170	177	170	177	170	177	177	177	177	177	177	177	175	177	175	177	175	177	175	177	175	177	175	177	175	177	174	177	176	177				PIII	0.960285	0.97665	0.97868	0.981726	0.988832	0.982741	0.988832	0.991845	0.991845	0.989806	0.947906	0.994893	0.982724
P182																																				23a	0.945303	0.983294	0.980907	0.991647	1	0.988067	1	0.98926	0.98926	0.986874	0.933174	0.988067	0.97503
																																				P182	0.973214	0.968889	0.977778	0.968889	0.968889	0.977778	0.968889	0.995475	0.995475	0.986425	0.782805	0.99095	0.964286
Fragment 2*																																				Note: Calculated taking into account only fragments present in each isolate. Isolate P182 presents only fragment 2; isolates 23PA and 50PA lack fragment 2; isolate 66PA lacks fragments 2 and 3; and isolate 23a lacks fragment 4.
MM1A
23PA																																				Aggregated difference values for the concatenated regions
50PA																																				DIFFERENCE	MM1A	23PA	50PA	66PA	157a	Ant	I11	58	72	222a	M95	190	P169
66PA																																				MM1A	0
157a	216	228																																		23PA	0.0328947	0
Ant	218	228							223	225																										50PA	0.0328947	0.00526316	0
I11	216	228							225	225	223	225																								66PA	0.0149813	0	0	0
58	217	224							218	225	219	225	218	225																						157a	0.0465587	0.0184211	0.0184211	0.0205993	0
72	217	224							218	225	219	225	218	225	221	221																				Ant	0.0367347	0.0243655	0.0289474	0.0197368	0.0101523	0
222a	215	224							216	225	217	225	216	225	219	221	219	221																		I11	0.0465587	0.0142132	0.0162437	0.00921053	0	0.0101523	0
M95	173	222							171	225	173	225	171	225	172	221	172	221	170	221																58	0.0416667	0.0213198	0.0203046	0.0142132	0.00913706	0.0162437	0.00913706	0
190	218	222							217	225	219	225	217	225	218	221	218	221	216	221	173	219														72	0.0416667	0.0213198	0.0203046	0.0142132	0.00913706	0.0162437	0.00913706	0	0
P169	216	224							213	228	215	228	213	228	215	224	215	224	214	224	168	224	214	224												222a	0.0436992	0.0233503	0.022335	0.0162437	0.0111675	0.0182741	0.0111675	0.00203874	0.00203874	0
P177	206	222							205	225	207	225	205	225	206	221	206	221	206	221	161	219	207	219	207	220										M95	0.0845214	0.0690355	0.0670051	0.0619289	0.0568528	0.0629442	0.0568528	0.049949	0.049949	0.0519878	0
P171	217	224							217	225	219	225	217	225	219	221	219	221	218	221	172	221	218	221	217	224	207	221								190	0.0376782	0.0213198	0.0192893	0.0142132	0.0101523	0.0162437	0.0101523	0.00509684	0.00509684	0.00713558	0.0490296	0
PIII	218	222							217	225	219	225	217	225	218	221	218	221	216	221	173	219	219	219	214	224	207	219	218	221						P169	0.0447154	0.0313765	0.0293522	0.0263158	0.0212551	0.0273279	0.0212551	0.0162602	0.0162602	0.0172764	0.0640244	0.0172764	0
23a	216	228							225	225	223	225	225	225	218	225	218	225	216	225	171	225	217	225	213	228	205	225	217	225	217	225				P177	0.0509165	0.0345178	0.0324873	0.0294416	0.0243655	0.0304569	0.0243655	0.0203874	0.0203874	0.0203874	0.0643514	0.0173647	0.0173469
P182	218	224							218	225	220	225	218	225	220	221	220	221	218	221	173	221	219	221	216	224	207	221	220	221	219	221	218	225		P171	0.0426829	0.0233503	0.0213198	0.0182741	0.013198	0.0192893	0.013198	0.00815494	0.00815494	0.00917431	0.0560652	0.00917431	0.0101626
																																				PIII	0.0397149	0.0233503	0.0213198	0.0182741	0.0111675	0.0172589	0.0111675	0.00815494	0.00815494	0.0101937	0.052094	0.00510725	0.0172764
Fragment 3*																																				23a	0.0546968	0.0167064	0.0190931	0.00835322	0	0.0119332	0	0.0107399	0.0107399	0.0131265	0.0668258	0.0119332	0.0249703
MM1A																																				P182	0.0267857	0.0311111	0.0222222	0.0311111	0.0311111	0.0222222	0.0311111	0.00452489	0.00452489	0.0135747	0.217195	0.00904977	0.0357143
23PA	209	226																																		Note: Calculated taking into account only fragments present in each isolate. Isolate P182 presents only fragment 2; isolates 23PA and 50PA lack fragment 2; isolate 66PA lacks fragments 2 and 3; and isolate 23a lacks fragment 4.
50PA	209	226	226	226
66PA
157a	208	226	223	226	223	226
Ant	208	218	215	226	215	226			218	226
I11	208	226	223	226	223	226			226	226	218	226
58	208	226	223	226	223	226			226	226	218	226	226	226
72	208	226	223	226	223	226			226	226	218	226	226	226	226	226
222a	208	226	223	226	223	226			226	226	218	226	226	226	226	226	226	226
M95	208	226	223	226	223	226			226	226	218	226	226	226	226	226	226	226	226	226
190	208	226	223	226	223	226			226	226	218	226	226	226	226	226	226	226	226	226	226	226
P169	208	226	223	226	223	226			226	226	218	226	226	226	226	226	226	226	226	226	226	226	226	226
P177	208	226	223	226	223	226			226	226	218	226	226	226	226	226	226	226	226	226	226	226	226	226	226	226
P171	208	226	223	226	223	226			226	226	218	226	226	226	226	226	226	226	226	226	226	226	226	226	226	226	226	226
PIII	208	226	223	226	223	226			226	226	218	226	226	226	226	226	226	226	226	226	226	226	226	226	226	226	226	226	226	226
23a	208	226	223	226	223	226			226	226	218	226	226	226	226	226	226	226	226	226	226	226	226	226	226	226	226	226	226	226	226	226
P182
Fragment 4*
MM1A
23PA	147	147
50PA	147	147	147	147
66PA	147	147	147	147	147	147
157a	147	147	147	147	147	147	147	147
Ant	147	147	147	147	147	147	147	147	147	147
I11	147	147	147	147	147	147	147	147	147	147	147	147
58	147	147	147	147	147	147	147	147	147	147	147	147	147	147
72	147	147	147	147	147	147	147	147	147	147	147	147	147	147	147	147
222a	147	147	147	147	147	147	147	147	147	147	147	147	147	147	147	147	147	147
M95	147	147	147	147	147	147	147	147	147	147	147	147	147	147	147	147	147	147	147	147
190	147	147	147	147	147	147	147	147	147	147	147	147	147	147	147	147	147	147	147	147	147	147
P169	147	147	147	147	147	147	147	147	147	147	147	147	147	147	147	147	147	147	147	147	147	147	147	147
P177	147	147	147	147	147	147	147	147	147	147	147	147	147	147	147	147	147	147	147	147	147	147	147	147	147	147
P171	147	147	147	147	147	147	147	147	147	147	147	147	147	147	147	147	147	147	147	147	147	147	147	147	147	147	147	147
PIII	147	147	147	147	147	147	147	147	147	147	147	147	147	147	147	147	147	147	147	147	147	147	147	147	147	147	147	147	147	147
23a
P182
Fragment 5*
MM1A
23PA	209	210
50PA	209	210	206	210
66PA	209	210	210	210	210	210
157a	206	210	206	210	206	210	206	210
Ant	206	210	206	210	206	210	206	210	210	210
I11	206	210	206	210	206	210	206	210	210	210	210	210
58	206	210	206	210	206	210	206	210	210	210	210	210	210	210
72	206	210	206	210	206	210	206	210	210	210	210	210	210	210	210	210
222a	206	210	206	210	206	210	206	210	210	210	210	210	210	210	210	210	210	210
M95	206	210	206	210	206	210	206	210	210	210	210	210	210	210	210	210	210	210	210	210
190	206	210	206	210	206	210	206	210	210	210	210	210	210	210	210	210	210	210	210	210	210	210
P169	204	210	204	210	204	210	204	210	206	210	206	210	206	210	206	210	206	210	206	210	206	210	206	210
P177	206	210	206	210	206	210	206	210	208	210	208	210	208	210	208	210	208	210	208	210	208	210	208	210	206	210
P171	206	210	206	210	206	210	206	210	208	210	208	210	208	210	208	210	208	210	208	210	208	210	208	210	208	210	208	210
PIII	206	210	206	210	206	210	206	210	208	210	208	210	208	210	208	210	208	210	208	210	208	210	208	210	206	210	208	210	208	210
23a	206	210	206	210	206	210	206	210	210	210	210	210	210	210	210	210	210	210	210	210	210	210	210	210	206	210	208	210	208	210	208	210
P182
* Each pair of numbers represents the number of identical amino acids and the total of amino acids compared between two isolates, respectively.
[truncated: 5 more columns]
